# Supplementary material for: Electrochemical graphitization transformation of deposited carbon for Li-ion storage: sustainable energy utilization from coke oven solid waste
Source: Royal Society of Chemistry journal article supplement (doi:10.1039/d2ta08198a), 2022-11-21
Supplement: d2ta08198a1.pdf [file d2ta08198a1.pdf]

## Supplementary information

**Table S1** The composition of DC

| Proximate analysis (wt%) |                 |                  |                  | Ultimate analysis (wt%, daf) |      |      |      |      | impurity element (wt%) |       |      |      |       |       |
|--------------------------|-----------------|------------------|------------------|------------------------------|------|------|------|------|------------------------|-------|------|------|-------|-------|
| M <sub>ad</sub>          | A <sub>ad</sub> | FC <sub>ad</sub> | V <sub>daf</sub> | C                            | H    | O    | N    | S    | Ca                     | Zn    | Fe   | Si   | Mg    | Al    |
| 0.05                     | 0.85            | 95.93            | 3.17             | 90.21                        | 2.37 | 3.72 | 0.84 | 0.58 | 0.14                   | 0.066 | 0.11 | 0.11 | 0.030 | 0.058 |

FC<sub>ad</sub> is the fixed carbon on air-dried basis, V<sub>daf</sub> is the volatile matter content on dry-ash-free basis, M<sub>ad</sub> is the moisture content on air-dried basis, and A<sub>ad</sub> is the ash content on air-dried basis.

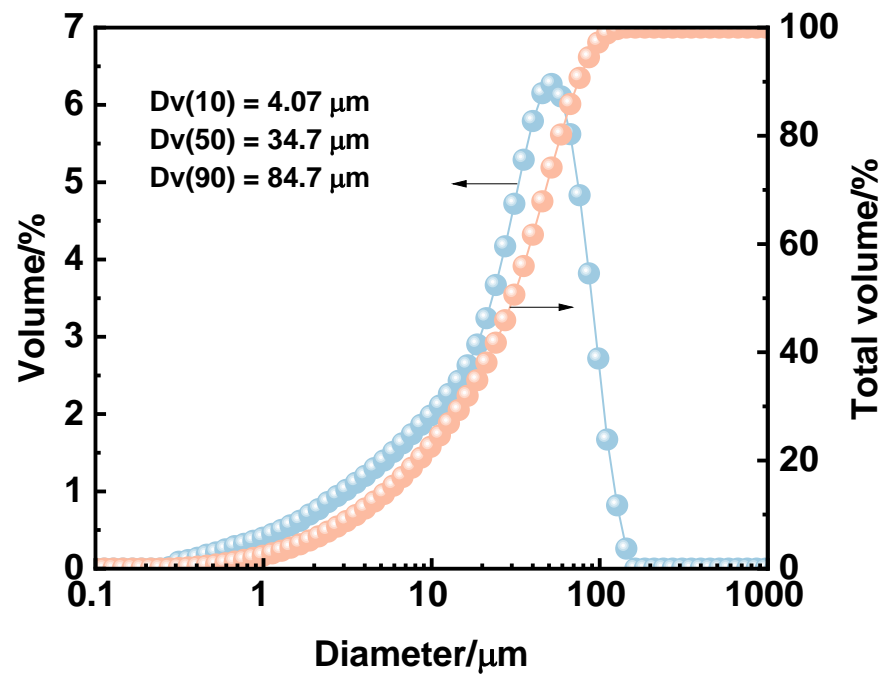

Fig. S1 The particle size distribution of DC

**Table S2** Electrolysis products obtained under different experimental conditions

| Experimental group | Experimental condition        |                  |                       | Electrolysis products |
|--------------------|-------------------------------|------------------|-----------------------|-----------------------|
|                    | electrolysis temperature (°C) | cell voltage (V) | electrolysis time (h) |                       |
| time               | 900                           | 2.6              | 0                     | DC                    |
|                    | 900                           | 2.6              | 4                     | EP-4h                 |
|                    | 900                           | 2.6              | 8                     | EP-8h                 |
|                    | 900                           | 2.6              | 12                    | EP-12h                |
| temperature        | 850                           | 2.6              | 8                     | EP-850°C              |
|                    | 900                           | 2.6              | 8                     | EP-8h                 |
|                    | 950                           | 2.6              | 8                     | EP-950°C              |
| voltage            | 900                           | 2.2              | 8                     | EP-2.2V               |
|                    | 900                           | 2.4              | 8                     | EP-2.4V               |
|                    | 900                           | 2.6              | 8                     | EP-8h                 |

**Table S3** Structural parameters derived from XRD pattern

| sample   | 2theta(002) | FWHM(002) | 2theta(100) | FWHM(100) | d(002) | La     | Lc    | N     | G     |
|----------|-------------|-----------|-------------|-----------|--------|--------|-------|-------|-------|
| DC       | 25.36       | 4.15      | 43.58       | 3.76      | 0.3509 | 4.65   | 1.94  | 5.53  | -0.81 |
| EP-4h    | 25.54       | 3.30      | 43.49       | 3.28      | 0.3485 | 5.34   | 2.44  | 7.01  | -0.53 |
| EP-8h    | 26.38       | 0.47      | 42.36       | 0.17      | 0.3376 | 105.58 | 17.35 | 51.40 | 0.74  |
| EP-12h   | 26.38       | 0.47      | 42.40       | 0.22      | 0.3376 | 78.48  | 17.35 | 51.40 | 0.74  |
| EP-850°C | 25.20       | 4.14      | 43.51       | 3.26      | 0.3531 | 5.37   | 1.95  | 5.51  | -1.06 |
| EP-950°C | 26.36       | 0.45      | 42.54       | 0.21      | 0.3379 | 81.45  | 17.89 | 52.96 | 0.71  |
| EP-2.2V  | 25.41       | 4.08      | 43.55       | 3.77      | 0.3503 | 4.64   | 1.98  | 5.64  | -0.73 |
| EP-2.4V  | 25.26       | 3.98      | 43.62       | 3.58      | 0.3524 | 4.88   | 2.02  | 5.74  | -0.98 |

FWHM is full width at half maximum of (002) diffraction peak and (100) diffraction peak; G represents degree of graphitization; Lc and La indicate average crystallite size

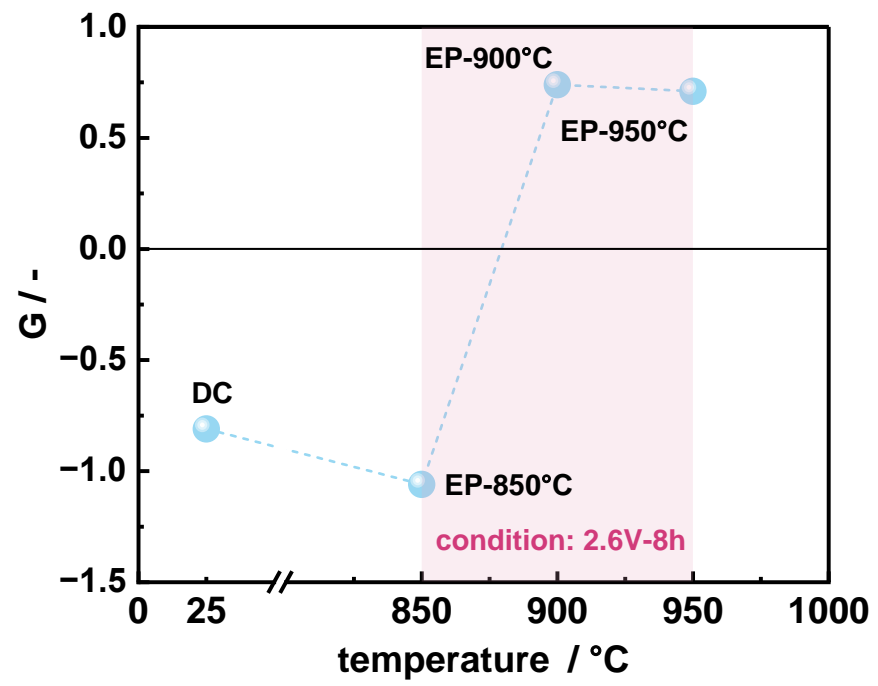

Fig.S2 The relationship between G value and temperature

**Table S4** Raman spectral parameters

| sample   | D4       |        | D1       |        | D3       |        | G        |       | D2       |       | Ratio  |
|----------|----------|--------|----------|--------|----------|--------|----------|-------|----------|-------|--------|
|          | Position | FWHM   | Position | FWHM   | Position | FWHM   | Position | FWHM  | Position | FWHM  | ID1/IG |
| DC       | 1185.00  | 232.74 | 1343.24  | 169.10 | 1545.85  | 191.78 | 1586.56  | 59.74 | 1602.35  | 41.33 | 1.87   |
| EP-4h    | 1185.00  | 199.52 | 1343.24  | 117.64 | 1518.34  | 215.20 | 1569.34  | 37.33 | 1609.17  | 50.20 | 0.96   |
| EP-8h    | -        | -      | 1345.39  | 65.90  | -        | -      | 1575.80  | 30.36 | 1615.63  | 32.72 | 0.29   |
| EP-12h   | -        | -      | 1345.39  | 77.61  | -        | -      | 1569.34  | 31.47 | 1605.94  | 34.71 | 0.20   |
| EP-850°C | 1185.00  | 211.26 | 1348.62  | 137.01 | 1535.67  | 200.01 | 1587.64  | 59.16 | 1605.63  | 65.04 | 2.75   |
| EP-950°C | -        | -      | 1349.70  | 58.14  | -        | -      | 1579.03  | 27.50 | 1617.79  | 35.32 | 0.22   |
| EP-2.2V  | 1185.00  | 194.99 | 1345.39  | 132.42 | 1538.96  | 199.68 | 1589.79  | 52.85 | 1620.01  | 44.57 | 1.84   |
| EP-2.4V  | 1185.00  | 189.53 | 1347.55  | 129.56 | 1528.71  | 193.75 | 1590.87  | 59.66 | 1620.00  | 60.03 | 1.78   |

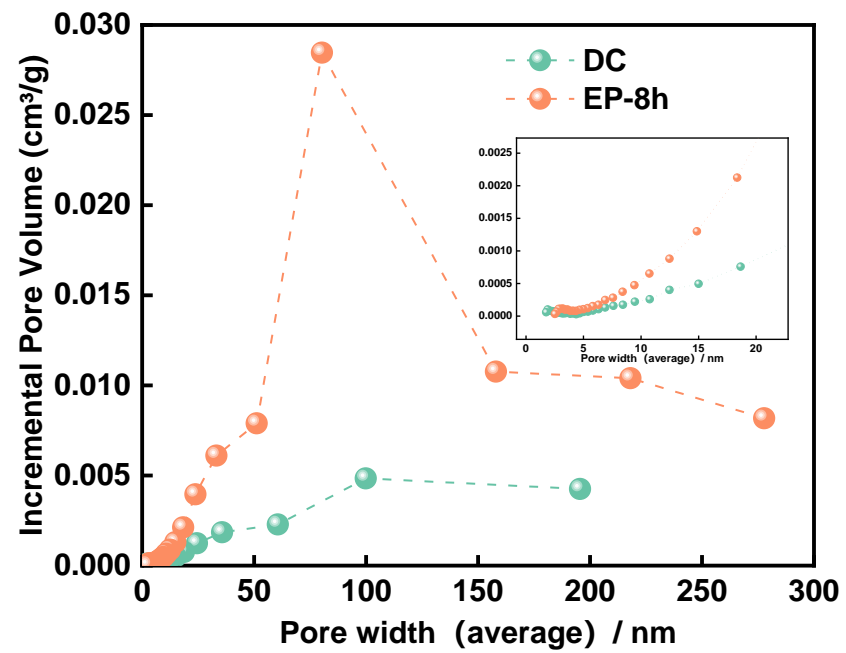

Fig. S3 The pore size distribution of DC and EP-8h

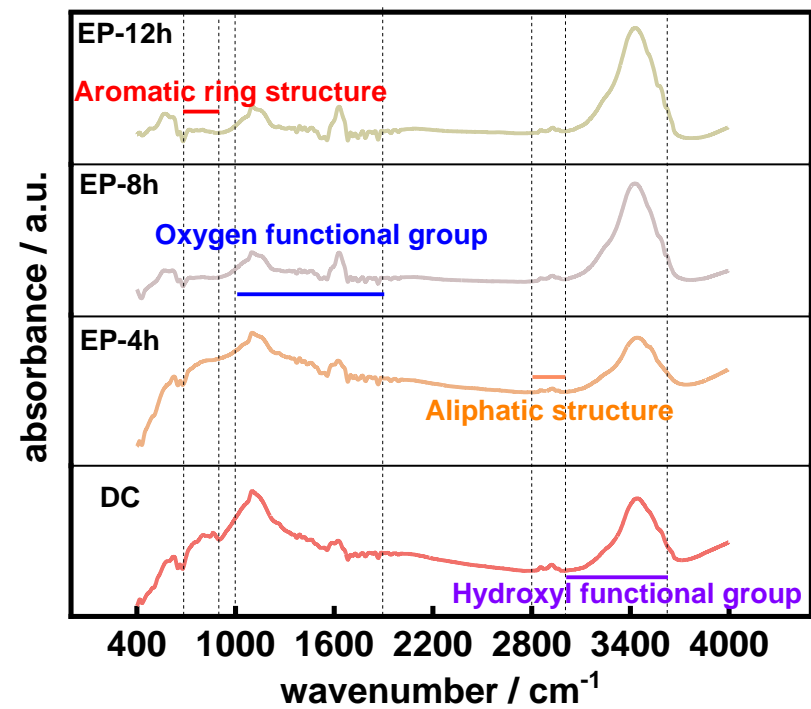

Fig.S4 FTIR spectra of DC and electrolysis products at different time



**Table S5** The near-surface chemical composition on the samples surface calculated from XPS spectra (atom, %)

| sample | C     | O    | N    | S    |
|--------|-------|------|------|------|
| DC     | 91.02 | 6.65 | 2.03 | 0.31 |
| EP-4h  | 93.93 | 4.61 | 1.24 | 0.22 |
| EP-8h  | 95.66 | 3.2  | 0.98 | 0.16 |
| EP-12h | 96.38 | 2.71 | 0.76 | 0.15 |

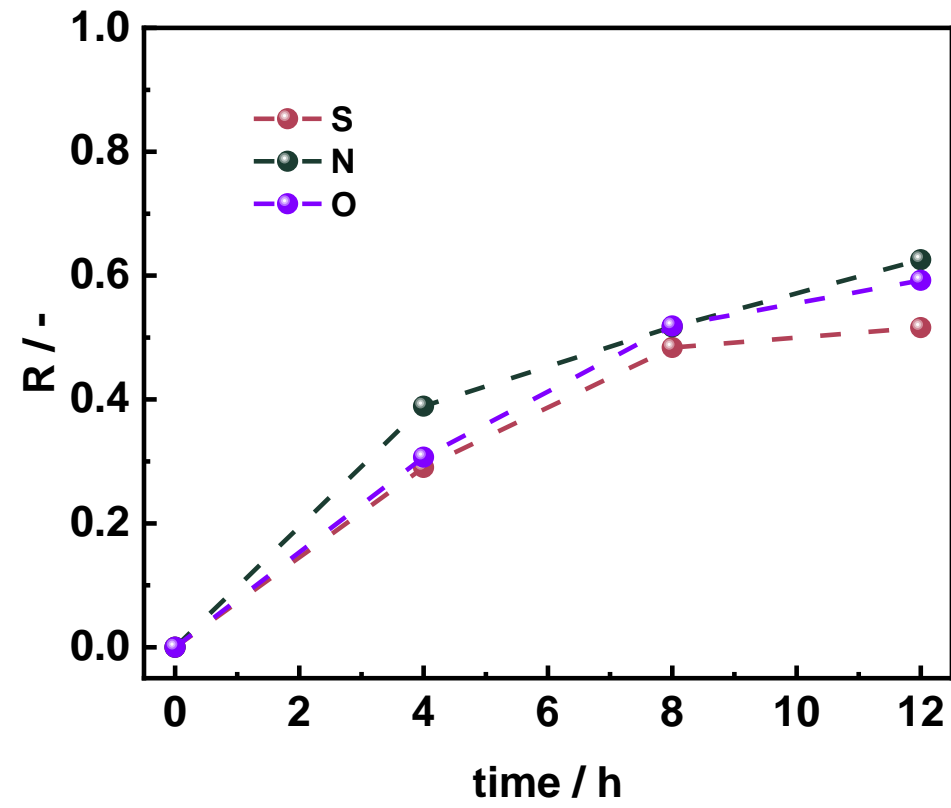

Fig.S5 The atomic conversion rate of S、N、O on the surface of the samples

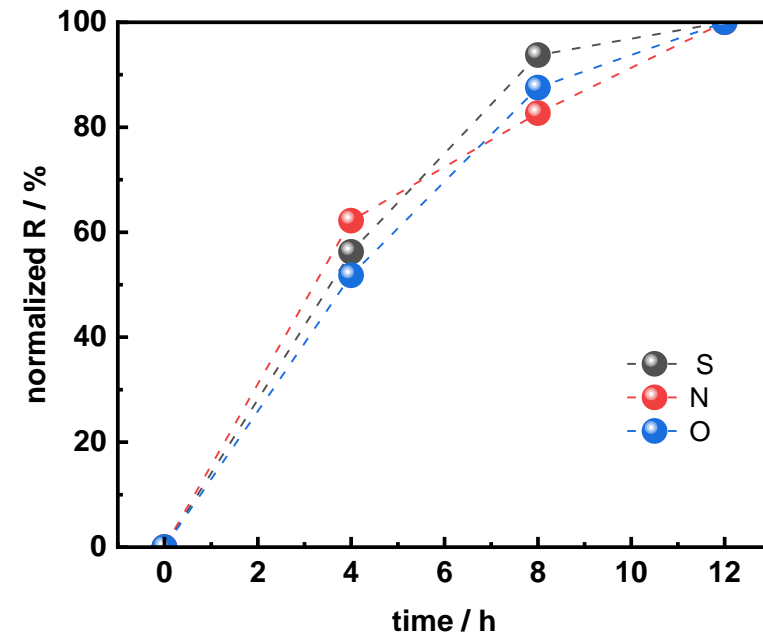

**Fig.S6** The atomic conversion rate (normalized) of S、N、O on the surface of the samples

**Table S6** Results of chemical bonds (area) calculated from XPS measurements.

| sample | sp <sup>2</sup> | sp <sup>3</sup> | $\pi$ - $\pi^*$ | sp <sup>2</sup> / sp <sup>3</sup> |
|--------|-----------------|-----------------|-----------------|-----------------------------------|
| DC     | 102556.200      | 37185.960       | 29761.830       | 2.758                             |
| EP-4h  | 82266.630       | 23581.250       | 17563.210       | 3.489                             |
| EP-8h  | 118223.300      | 27757.740       | 27757.740       | 4.259                             |
| EP-12h | 121069.600      | 27755.140       | 26099.110       | 4.362                             |
